# Supplementary material for: Association of Polygenic Risk Score and Bacterial Toxins at Screening Colonoscopy with Colorectal Cancer Progression: A Multicenter Case-Control Study
Source: MDPI journal article supplement (doi:10.3390/toxins13080569), 2021-08-16
Supplement: s1 [file s1]

# Association of Polygenic Risk Score and Bacterial Toxins at Screening Colonoscopy with Colorectal Cancer Progression: A Multicenter Case-Control Study

Alfonso Piciocchi, Elena Angela Pia Germinario, Koldo Garcia Etxebarria, Silvia Rossi, Lupe Sanchez-Mete, Barbara Porowska, Vittoria Stigliano, Paolo Trentino, Andrea Oddi, Fabio Accarpio, Gian Luca Grazi, Giovanni Bruno, Massimo Bonucci, Massimo Giambenedetti, Patrizia Spigaglia, Fabrizio Barbanti, Slawomir Owczarek, Ida Luzzi, Elisabetta Delibato, Zaira Maroccia, Lorenza Nisticò, Carla Fiorentini, Mauro D'Amato, Roberta De Angelis, and Alessia Fabbri

Table S1

| Gene target               | Amplicon (bp)                                                 | Annealing temp (°C) | Melting temp (°C) | Primer concentration (nM) |
|---------------------------|---------------------------------------------------------------|---------------------|-------------------|---------------------------|
| <i>cnf1mac1</i> (1)       | mac1 5'-GGG GGA AGT ACA GAA GAA TTA- 3' (Biomers.net)         | 52                  | 78.5±1            | 200                       |
| <i>cnf1mac2</i> (1)       | mac2 5'-TTG CCG TCC ACT CTC ACC AGT -3' (Biomers.net)         | 52                  | 78.5±1            | 200                       |
| <i>cdt-S2</i> (1)         | S2 5'-GAA AAT AAA TGG AAC ACA CAT GT CCG -3' (Biomers.net)    | 52                  | 80±1              | 200                       |
| <i>cdt-AS2</i> (1)        | AS2 5'-AAA TCT CCT GCA ATC ATC CAG TTA -3' (Biomers.net)      | 52                  | 80±1              | 200                       |
| <i>gapA2</i> (This study) | 5'-CAG AAC ATC ATC CCG TCC-3' (Biomers.net)                   | 52                  | 82.5±1            | 200                       |
| <i>gapA1</i> (This study) | 5'-GTT CAG AGC GAT ACC AGC-3' (Biomers.net)                   | 52                  | 82.5±1            | 200                       |
| <i>cif-P1</i> (1)         | 5'- AACAGATGGCAACAGACTGG - 3' (ISC Bio Basic INC)             | 52                  | 80±1              | 200                       |
| <i>cif-P2</i> (1)         | 5'- AGTCAATGCTTTATGCGTCAT -3' (ISC Bio Basic INC)             | 52                  | 80±1              | 200                       |
| <i>pks clbA1</i> (1)      | 5'-CAG ATA CAC AGA TAC CAT TCA -3' (Biomers.net)              | 55                  | 86.5±1            | 200                       |
| <i>pks clbA2</i> (1)      | 5'-CTA GAT TAT CCG TGG CGA TTC-3' (Biomers.net)               | 55                  | 86.5±1            | 200                       |
| <i>pks clbQ1</i> (1)      | 5'-TTA TCC TGT TAG CTT TCG TTC -3' (Biomers.net)              | 55                  | 86.5±1            | 200                       |
| <i>pks clbQ2</i> (1)      | 5'-CTT GTA TAG TTA CAC AAC TAT TTC-3' (Biomers.net)           | 55                  | 86.5±1            | 200                       |
| <i>b-fra R</i> (2)        | R 5'-CCA GTA TCA ACT GCA ATT TTA-3' (Biomers.net)             | 52                  | 82±1              | 200                       |
| <i>b-fra F</i> (2)        | F 5'-ATA GCC TTT CGA AAG RAA GAT-3' (Biomers.net)             | 52                  | 82±1              | 200                       |
| <i>bft 1</i> (3)          | 5'-GAC GGT GTA TGT GAT TTG TCT GAG AGA-3' (ISC Bio Basic INC) | 52                  | 79±1              | 200                       |
| <i>bft 2</i> (3)          | 5'-ATC CCT AAG ATT TTA TTA TCC CAA GTA-3' (ISC Bio Basic INC) | 52                  | 79±1              | 200                       |

## References

- Buc et al., 2013 DOI: 10.1371/journal.pone.0056964  
Matsuki et al., 2002 DOI:10.1128/AEM.68.11.5445-5451.2002  
Pantosti et al., 1997 PMID: 9316893
